# Supplementary material for: 2D heterogeneous vanadium compound interfacial modulation enhanced synergistic catalytic hydrogen evolution for full pH range seawater splitting
Source: Royal Society of Chemistry journal article supplement (doi:10.1039/d0nr00207k), 2020-01-01
Supplement: d0nr00207k1.pdf [file d0nr00207k1.pdf]

## Supporting Information:

# 2D-Heterogeneous Vanadium Compound Interfacial Modulation Enhanced Synergistic Catalytic Hydrogen Evolution for Full pH Range Seawater Splitting

*Zhenguo Wang<sup>a</sup>, Wangqiong Xu<sup>a</sup>, Ke Yu<sup>\*, a, b</sup>, Yu Feng<sup>a</sup> and Ziqiang Zhu<sup>a</sup>*

<sup>a</sup> Key Laboratory of Polar Materials and Devices (MOE), Department of Electronics, East China Normal University, Shanghai 200241, China

<sup>b</sup> Collaborative Innovation Center of Extreme Optics, Shanxi University, Taiyuan, Shanxi 030006, China

## Corresponding Author

\* Tel.: +86 21 54345198; Fax: +86 21 54345119. E-mail address: yk5188@263.net

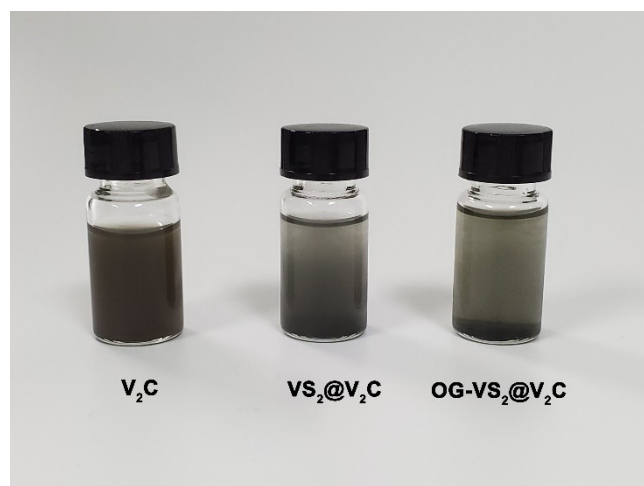

**Fig. S1 Colloidal solutions of three catalytic materials.**

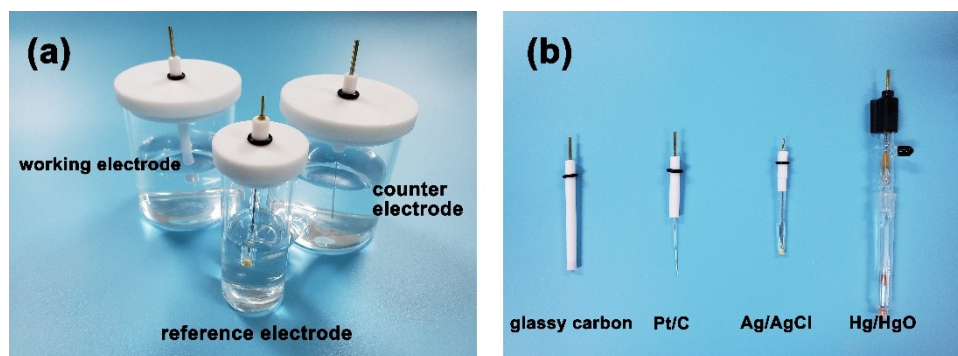

**Fig. S2** Equipment used in electrocatalytic testing: (a) three-electrode electrolytic cell (b) various electrodes.

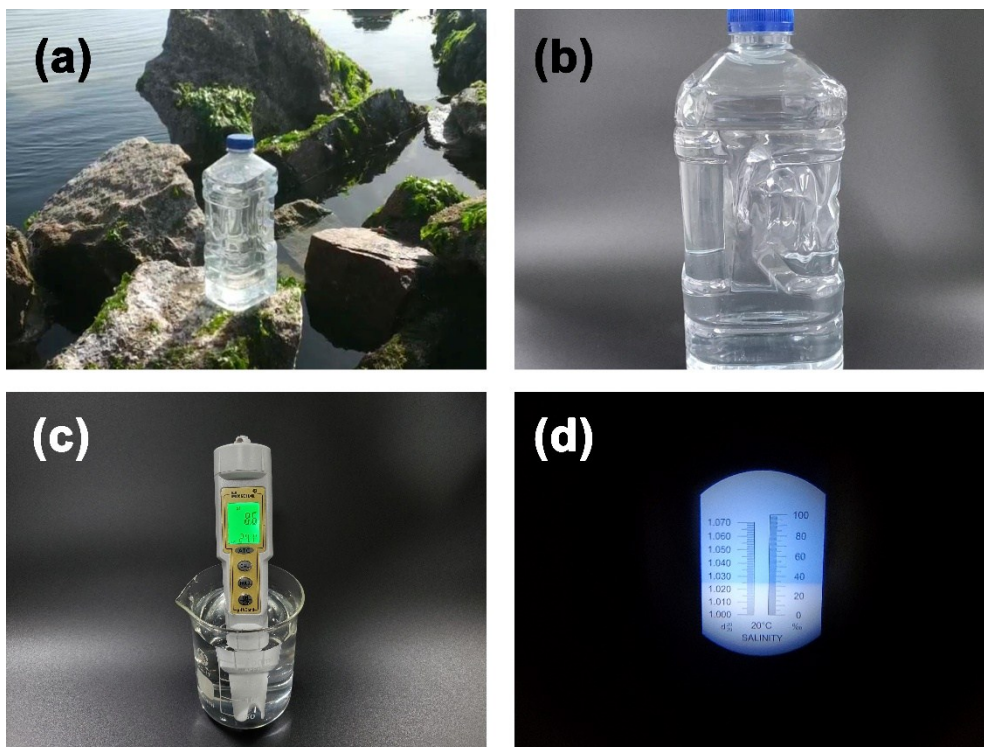

**Fig. S3 (a) and (b) The seawater collection and purification. (c) The PH test of seawater. (d) The salinity test of seawater.**

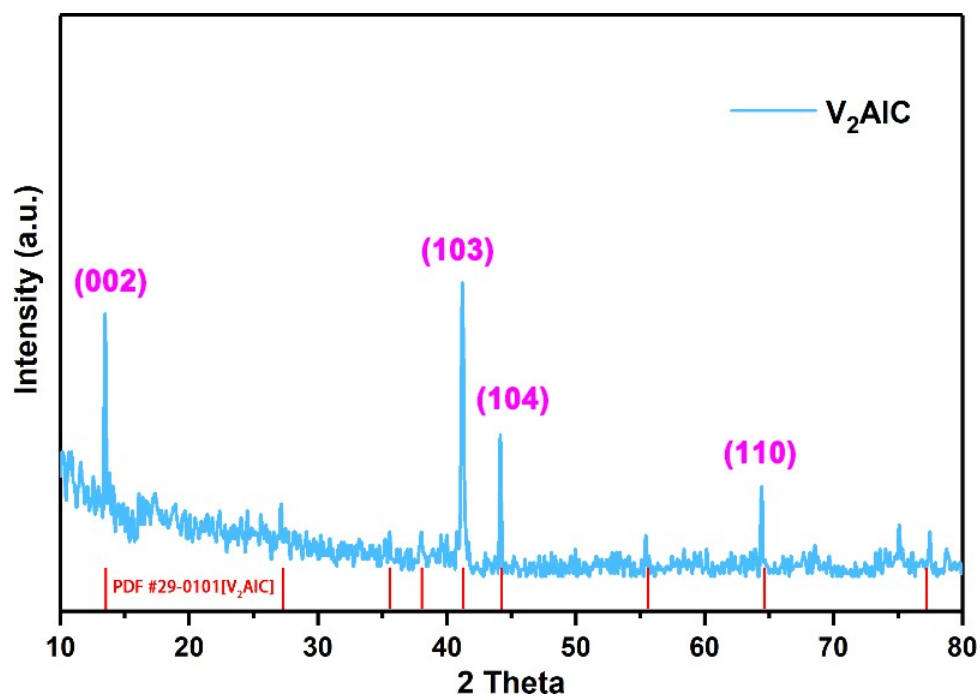

Fig. S4 XRD pattern of  $V_2AlC$  precursor.

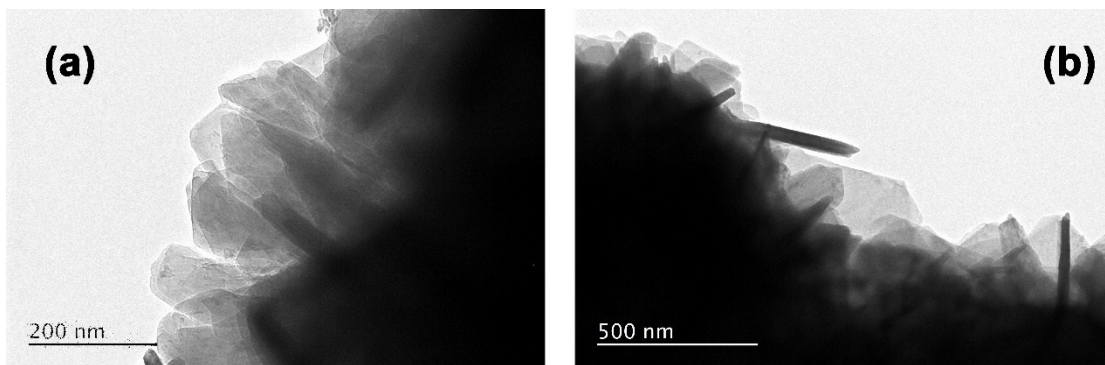

**Fig. S5** Electron microscope pictures of different positions of VS<sub>2</sub>@V<sub>2</sub>C catalyst.

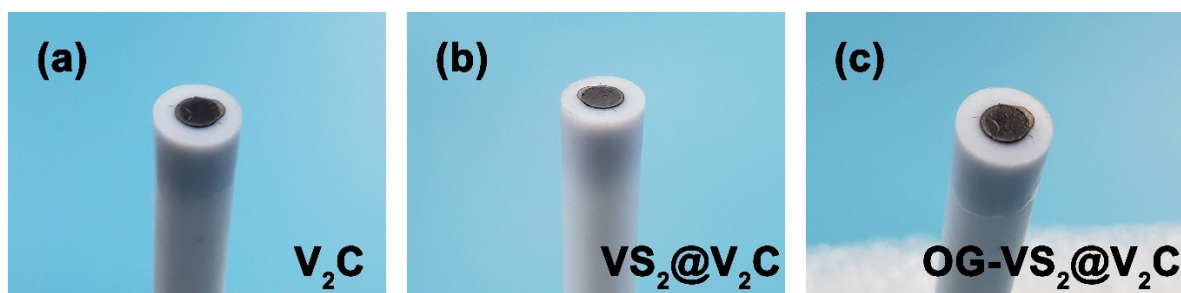

**Fig. S6** Three kinds of catalytic material freshly prepared working electrode. (a)  $V_2C$ . (b)  $VS_2@V_2C$ . (c)  $OG-VS_2@V_2C$ .

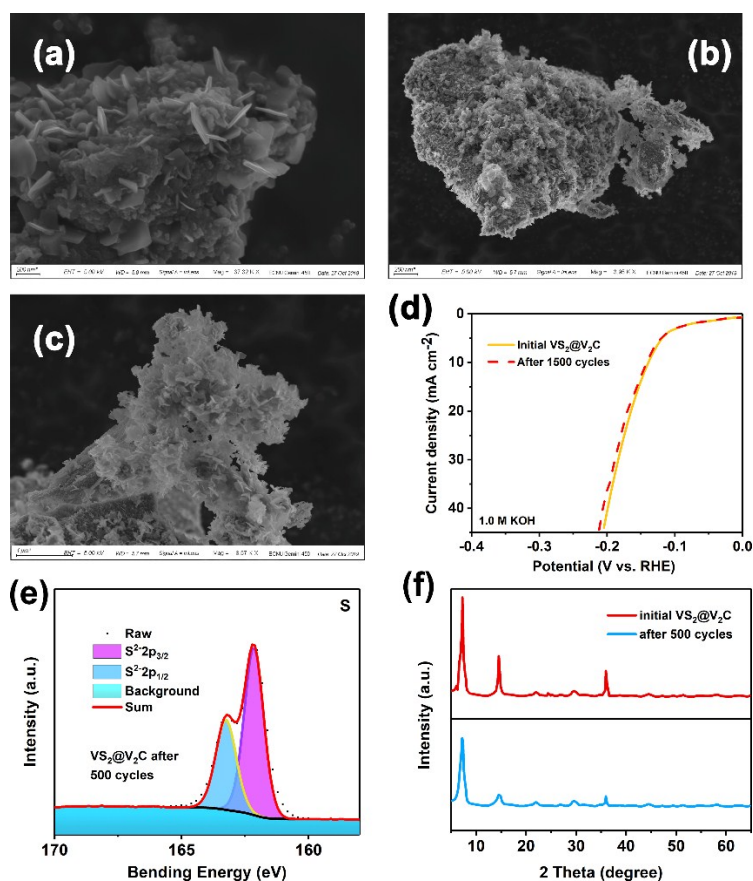

**Fig. S7 (a)-(c)** Different magnification electron microscope pictures of VS<sub>2</sub>@V<sub>2</sub>C catalyst after a long cycle. **(d)** Test results of hydrogen evolution stability of the composite material. **(e)** XPS pattern of VS<sub>2</sub>@V<sub>2</sub>C catalyst after a long cycle. **(f)** XRD patterns of initial VS<sub>2</sub>@V<sub>2</sub>C and catalyst after a long cycle.



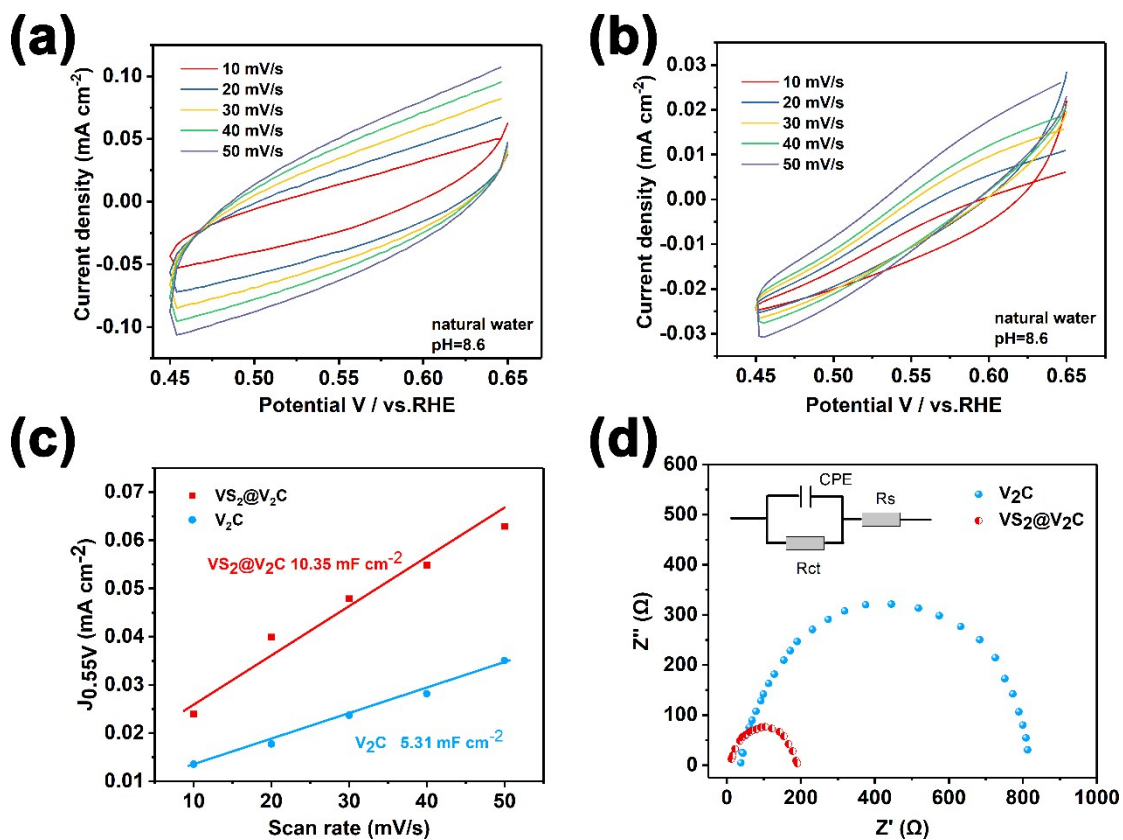

Fig. S8 (a)-(b) Cyclic voltammetry tests of VS<sub>2</sub>@V<sub>2</sub>C and V<sub>2</sub>C. (c) Double-layer capacitor performance results of VS<sub>2</sub>@V<sub>2</sub>C and V<sub>2</sub>C. (d) EIS AC impedance spectrum of VS<sub>2</sub>@V<sub>2</sub>C and V<sub>2</sub>C. The illustration shows the equivalent circuit.

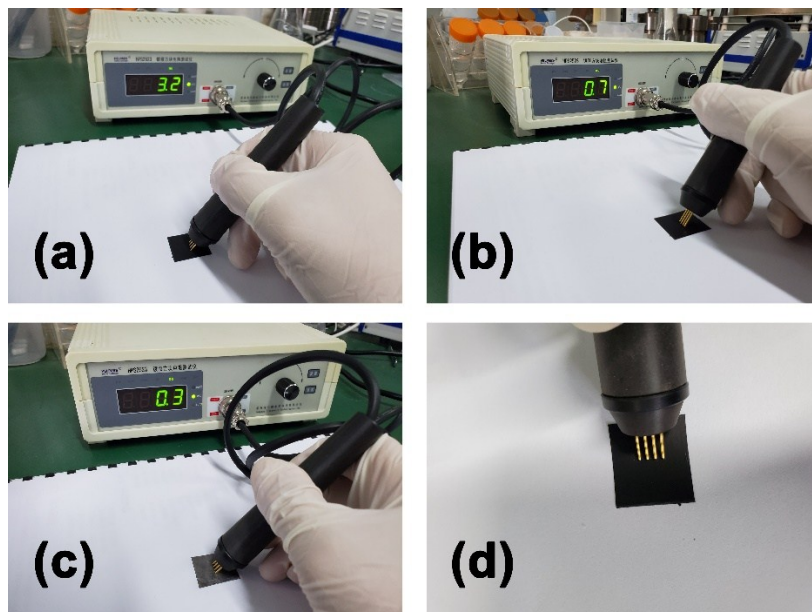

**Fig. S9** The square resistance test results of (a)  $V_2C$ - $3.2\Omega\cdot\text{cm}$  (b)  $OG\text{-}VS_2@V_2C$ - $0.7\Omega\cdot\text{cm}$  (c)  $VS_2@V_2C$ - $0.3\Omega\cdot\text{cm}$ . (d) Composite material film and four-probe tester.

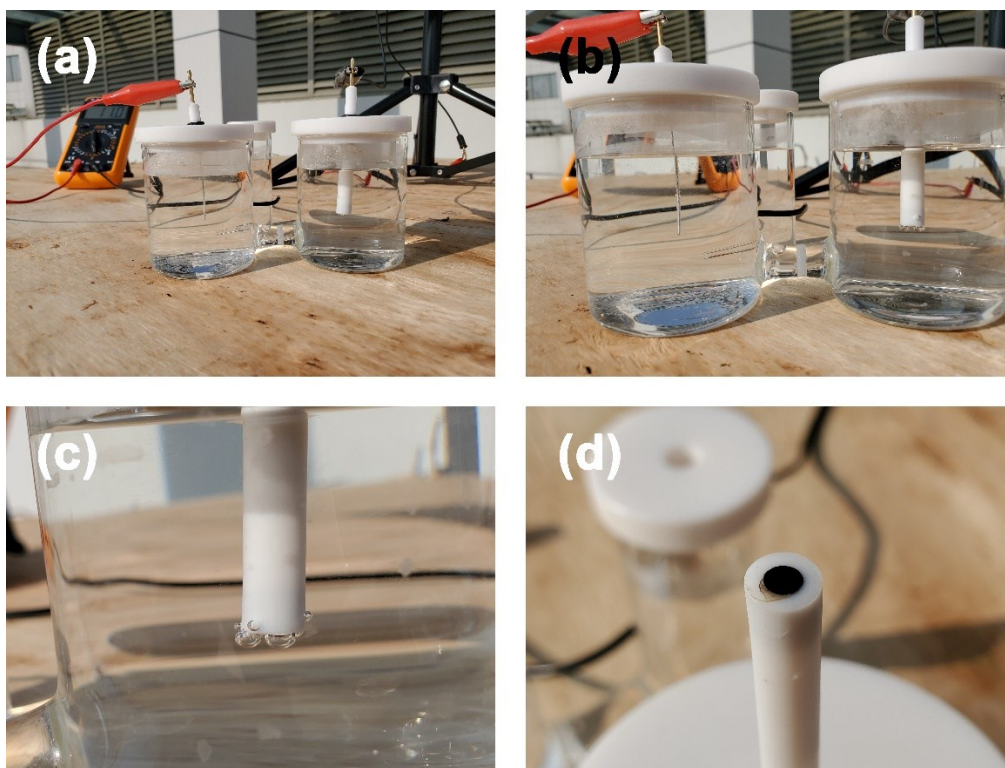

**Fig. S10 Electrohydrogen evolution system powered by solar photovoltaic cells.**

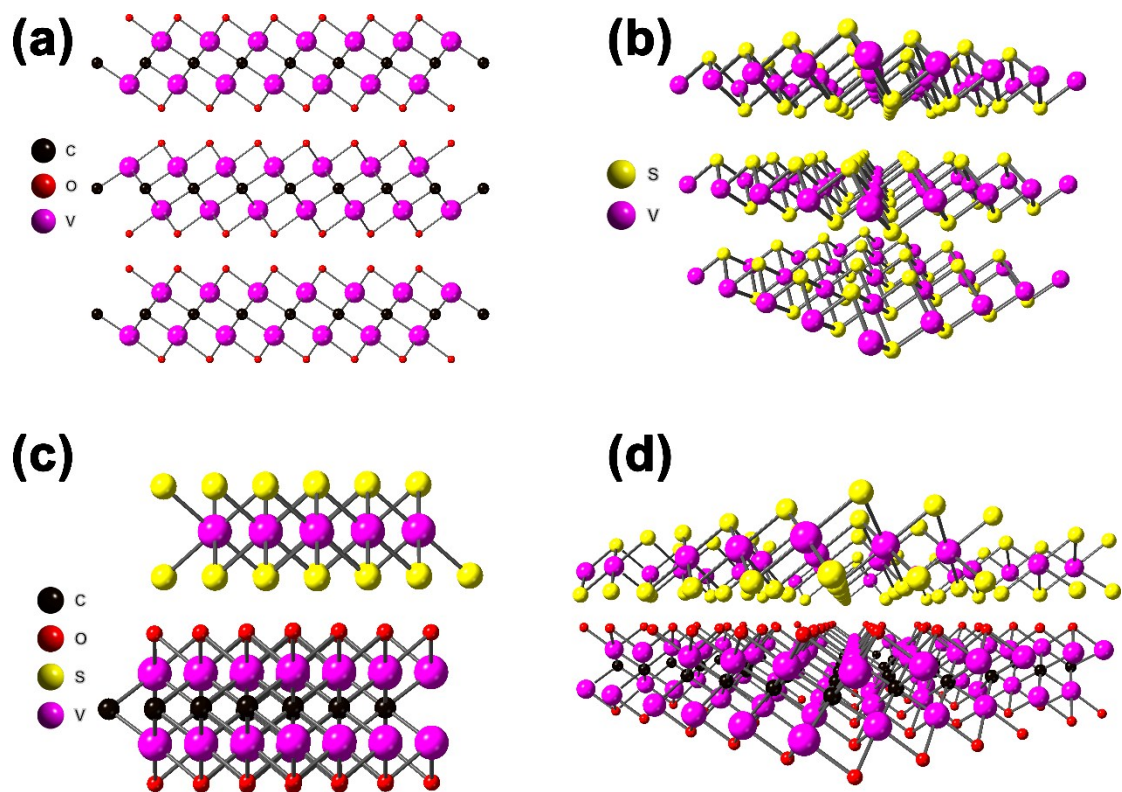

**Fig. S11** The optimized crystal structure model of (a)  $V_2CO_2$  (b)  $MoS_2$  (c)-  
(d)  $VS_2@V_2C$ .

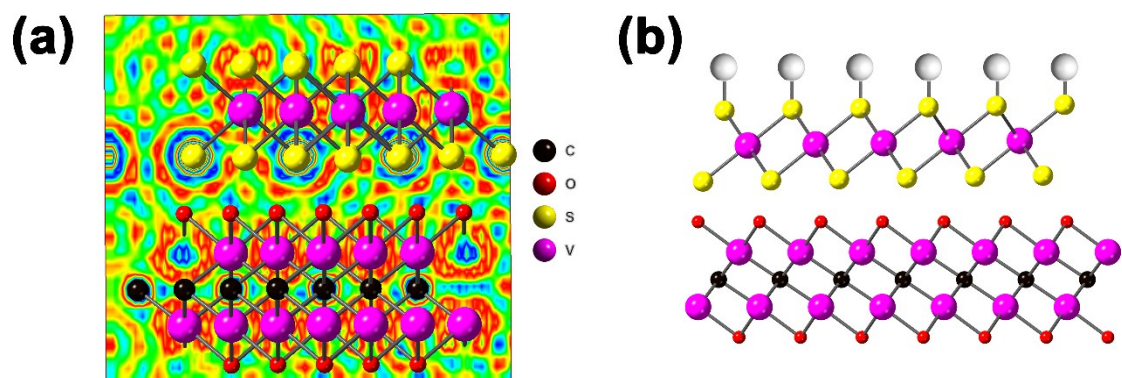

Fig. S12 (a) Charge density difference graph on  $\text{VS}_2@V_2C$  (110) crystal plane. (b) Composite material hydrogen adsorption model.

**Table S1 Variation of hydrogen evolution overpotential of each catalytic material with pH at the current density of 20 mA cm<sup>-2</sup> (mV).**

| Catalyst\pH                          | 0   | 2.0 | 4.0 | 7.0 | 8.6 | 10.0 | 12.0 | 13.8 |
|--------------------------------------|-----|-----|-----|-----|-----|------|------|------|
| V <sub>2</sub> C                     | 526 | 748 | 931 | -   | -   | -    | -    | 572  |
| OG-VS <sub>2</sub> @V <sub>2</sub> C | 273 | 402 | 549 | 724 | 634 | 573  | 455  | 304  |
| VS <sub>2</sub> @V <sub>2</sub> C    | 148 | 271 | 387 | 527 | 444 | 396  | 320  | 164  |
| Pt/C                                 | 86  | 176 | 281 | 489 | 428 | 367  | 246  | 91   |

**Table S2 Variation of Tafel slope of each catalytic material with pH at the current density of 20 mA cm<sup>-2</sup> (mV/dec).**

| Catalyst\pH                          | 0  | 2.0 | 4.0 | 7.0 | 8.6 | 10.0 | 12.0 | 13.8 |
|--------------------------------------|----|-----|-----|-----|-----|------|------|------|
| OG-VS <sub>2</sub> @V <sub>2</sub> C | 54 | 93  | 146 | 193 | 174 | 158  | 121  | 85   |
| VS <sub>2</sub> @V <sub>2</sub> C    | 37 | 81  | 124 | 171 | 160 | 149  | 105  | 48   |
| Pt/C                                 | 28 | 76  | 103 | 155 | 143 | 132  | 99   | 32   |

**Table S3 recent advance of HER performance of VS<sub>2</sub>-based catalysts.**

| Morphology                                                         | n (mV) at 10 mA cm <sup>-2</sup> | Tafel slope | Electrolyte                          | Year | Ref.      |
|--------------------------------------------------------------------|----------------------------------|-------------|--------------------------------------|------|-----------|
| VS <sub>2</sub> @V <sub>2</sub> C                                  | 94                               | 37          | 0.5 M H <sub>2</sub> SO <sub>4</sub> | -    | This work |
|                                                                    | 137                              | 58          | 1.0 M KOH                            | -    |           |
| VS <sub>2</sub> /rGO                                               | 350                              | 150         | 1.0 M KOH                            | 2015 | 1         |
| MoS <sub>2</sub> nanodots/V <sub>2</sub> S <sub>2</sub> nanosheets | 291                              | 58.1        | 1.0 M KOH                            | 2018 | 2         |
| N-doped Ni <sub>3</sub> S <sub>2</sub> nanosheets                  | 151                              | 107.5       | 1.0 M KOH                            | 2018 | 3         |
| VSSe nanoplates                                                    | 180                              | 87          | 1.0 M KOH                            | 2019 | 4         |
| VS <sub>4</sub> /rGO                                               | 210                              | 73          | 1.0 M KOH                            | 2018 | 5         |
| VS <sub>2</sub> @MoS <sub>2</sub> nanocomposites                   | 177                              | 54.9        | 1.0 M KOH                            | 2017 | 6         |

|                                                     |     |     |                                      |      |    |
|-----------------------------------------------------|-----|-----|--------------------------------------|------|----|
| VSe nanosheets                                      | 206 | 88  | 1.0 M KOH                            | 2016 | 7  |
| VS <sub>2</sub> nanoflowers                         | 400 | 170 | 0.5 M H <sub>2</sub> SO <sub>4</sub> | 2018 | 8  |
| Bulk VS <sub>2</sub>                                | 120 | 70  | 0.5 M H <sub>2</sub> SO <sub>4</sub> | 2019 | 9  |
| VS <sub>2</sub> nanosheets                          | 450 | 201 | 0.5 M H <sub>2</sub> SO <sub>4</sub> | 2015 | 1  |
| CVD grown VS <sub>2</sub> nanosheets                | 68  | 34  | 0.5 M H <sub>2</sub> SO <sub>4</sub> | 2015 | 10 |
| V <sub>0.09</sub> Mo <sub>0.91</sub> S <sub>2</sub> | 240 | 69  | 0.5 M H <sub>2</sub> SO <sub>4</sub> | 2014 | 11 |

## Reference

- (1) Mohan, P.; Yang, J.; Jena, A.; Shin, H. S. VS<sub>2</sub>/rGO hybrid nanosheets prepared by annealing of VS<sub>4</sub>/rGO. *Journal Of Solid State Chemistry* **2015**, *224*, 82-87, DOI: 10.1016/j.jssc.2014.06.031.
- (2) Du, C.; Liang, D.; Shang, M.; Zhang, J.; Mao, J.; Liu, P.; Song, W. In Situ Engineering MoS<sub>2</sub> NDs/VS<sub>2</sub> Lamellar Heterostructure for Enhanced Electrocatalytic Hydrogen Evolution. *Acs Sustainable Chemistry & Engineering* **2018**, *6* (11), 15471-15479, DOI: 10.1021/acssuschemeng.8b03929.
- (3) Zhong, X.; Tang, J.; Wang, J.; Shao, M.; Chai, J.; Wang, S.; Yang, M.; Yang, Y.; Wang, N.; Wang, S.; Xu, B.; Pan, H. 3D heterostructured pure and N-Doped Ni<sub>3</sub>S<sub>2</sub>/VS<sub>2</sub> nanosheets for high efficient overall water splitting. *Electrochimica Acta* **2018**, *269*, 55-61, DOI: 10.1016/j.electacta.2018.02.131.
- (4) Hu, P.; Long, G.; Chaturvedi, A.; Wang, S.; Tan, K.; He, Y.; Zheng, L.; Liu, G.; Ke, Y.; Zhou, Y.; Jiang, H.; Liu, Z.; Zhang, M.; Long, Y. Agent-assisted VSSe ternary alloy single crystals as an efficient stable electrocatalyst for the hydrogen evolution reaction. *Journal Of Materials Chemistry A* **2019**, *7* (26), 15714-15721, DOI: 10.1039/c9ta04287c.
- (5) Das, J. K.; Samantara, A. K.; Nayak, A. K.; Pradhan, D.; Behera, J. N. VS<sub>2</sub>: an efficient catalyst for an electrochemical hydrogen evolution reaction in an acidic medium. *Dalton Transactions* **2018**, *47*



- (39), DOI: 10.1039/c8dt02547a.
- (6) Chen, X.; Yu, K.; Shen, Y.; Feng, Y.; Zhu, Z. Synergistic Effect of MoS<sub>2</sub> Nanosheets and VS<sub>2</sub> for the Hydrogen Evolution Reaction with Enhanced Humidity-Sensing Performance. *Acs Applied Materials & Interfaces* **2017**, *9* (48), 42139-42148, DOI: 10.1021/acsami.7b14957.
- (7) Zhao, W.; Dong, B.; Guo, Z.; Su, G.; Gao, R.; Wang, W.; Cao, L. Colloidal synthesis of VSe<sub>2</sub> single-layer nanosheets as novel electrocatalysts for the hydrogen evolution reaction. *Chemical Communications* **2016**, *52* (59), 9228-9231, DOI: 10.1039/c6cc03854a.
- (8) Zhang, W.; Chen, X.; Zhang, J.; Tuo, C.; Ji, L.; Li, H.; Zhang, X.; Yang, F. Exposure of active edge structure for electrochemical H<sub>2</sub> evolution from VS<sub>2</sub>/MWCNTs hybrid catalysts. *International Journal Of Hydrogen Energy* **2018**, *43* (51), 22949-22954, DOI: 10.1016/j.ijhydene.2018.10.168.
- (9) Yang, M.; Cao, L.; Wang, Z.; Qu, Y.; Shang, C.; Guo, H.; Xiong, W.; Zhang, J.; Shi, R.; Zou, J.; Cheng, C.; Pan, H.; Lu, Z. Vanadium self-intercalated C/V<sub>1.11</sub>S<sub>2</sub> nanosheets with abundant active sites for enhanced electro-catalytic hydrogen evolution. *Electrochimica Acta* **2019**, *300*, 208-216, DOI: 10.1016/j.electacta.2019.01.038.
- (10) Yuan, J.; Wu, J.; Hardy, W. J.; Loya, P.; Lou, M.; Yang, Y.; Najmaei, S.; Jiang, M.; Qin, F.; Keyshar, K.; Ji, H.; Gao, W.; Bao, J.; Kono, J.; Natelson, D.; Ajayan, P. M.; Lou, J. Facile Synthesis of Single Crystal Vanadium Disulfide Nanosheets by Chemical Vapor Deposition for Efficient Hydrogen Evolution Reaction. *Advanced Materials* **2015**, *27* (37), 5605-5609, DOI: 10.1002/adma.201502075.
- (11) Sun, X.; Dai, J.; Guo, Y.; Wu, C.; Hu, F.; Zhao, J.; Zeng, X.; Xie, Y. Semimetallic molybdenum disulfide ultrathin nanosheets as an efficient electrocatalyst for hydrogen evolution. *Nanoscale* **2014**, *6* (14), 8359-8367, DOI: 10.1039/c4nr01894j.
